# Supplementary material
Source: PubMed Central journal article supplement (PMC3990649)
Supplement: NIHMS557963-supplement-supplemental_material.pdf [file NIHMS557963-supplement-supplemental_material.pdf]

## SUPPLEMENTAL MATERIAL

**Correlates of TNF, sTNF-R1 and sTNF-R2 in Health ABC Participants**

| Correlate                                                        | TNF  |        | sTNF-R1 |       | sTNF-R2 |       |         |
|------------------------------------------------------------------|------|--------|---------|-------|---------|-------|---------|
|                                                                  | N    | rho    | p Value | rho   | p Value | rho   | p Value |
| <b>Age</b>                                                       | 1285 | 0.08   | 0.01    | 0.16  | <0.001  | 0.15  | <0.001  |
| <b>Sex (men=0, women=1)</b>                                      | 1285 | -0.04  | 0.14    | -0.09 | <0.001  | -0.07 | 0.02    |
| <b>Race (white=0, black=1)</b>                                   | 1285 | -0.11  | <0.001  | -0.17 | <0.001  | -0.1  | <0.001  |
| <b>Body mass index</b>                                           | 1285 | 0.08   | 0.004   | 0.14  | <0.001  | 0.09  | 0.001   |
| <b>Waist/thigh circumference ratio</b>                           | 1280 | 0.17   | <0.001  | 0.21  | <0.001  | 0.14  | <0.001  |
| <b>Smoking (no=0, past=1, current=2)</b>                         | 1285 | 0.07   | 0.01    | 0.09  | <0.002  | 0.07  | 0.01    |
| <b>Alcohol consumption (drinks/week)</b>                         | 1283 | -0.01  | 0.73    | -0.09 | 0.002   | -0.09 | 0.002   |
| <b>Diabetes mellitus (no=0, yes=1)</b>                           | 1284 | 0.07   | 0.01    | 0.11  | <0.001  | 0.08  | 0.01    |
| <b>Hypertension (no=0, yes=1)</b>                                | 1277 | 0.09   | <0.001  | 0.11  | <0.001  | 0.11  | <0.001  |
| <b>Coronary heart disease<br/>(no=0, probable=1, definite=2)</b> | 1259 | 0.16   | <0.001  | 0.1   | <0.001  | 0.08  | <0.001  |
| <b>Cerebrovascular disease (no=0, yes=1)</b>                     | 1270 | 0.03   | 0.23    | 0.08  | <0.001  | 0.06  | 0.02    |
| <b>Peripheral vascular disease<br/>(no=0,yes=1)</b>              | 1254 | 0.08   | <0.001  | 0.11  | <0.001  | 0.1   | <0.001  |
| <b>Left ventricular hypertrophy (no=0,<br/>yes=1)</b>            | 1285 | 0.03   | 0.34    | -0.02 | 0.44    | 0.002 | 0.95    |
| <b>Systolic blood pressure</b>                                   | 1285 | 0.03   | 0.28    | 0.02  | 0.41    | 0.03  | 0.24    |
| <b>Diastolic blood pressure</b>                                  | 1285 | <0.001 | 0.88    | -0.03 | 0.21    | -0.02 | 0.53    |
| <b>Heart rate</b>                                                | 1285 | 0.02   | 0.55    | 0.04  | 0.14    | 0.05  | 0.06    |
| <b>Fasting glucose</b>                                           | 1254 | 0.07   | 0.02    | 0.07  | 0.01    | 0.04  | 0.16    |
| <b>Albumin</b>                                                   | 1284 | -0.06  | 0.04    | -0.1  | <0.001  | -0.08 | <0.001  |
| <b>Creatinine</b>                                                | 1284 | 0.25   | <0.001  | 0.4   | <0.001  | 0.36  | <0.001  |
| <b>Low-density lipoprotein</b>                                   | 1266 | -0.01  | 0.63    | -0.08 | <0.001  | -0.09 | <0.001  |
| <b>High-density lipoprotein</b>                                  | 1284 | -0.31  | <0.001  | -0.21 | <0.001  | -0.19 | <0.001  |

|                          |      |       |        |       |        |       |        |
|--------------------------|------|-------|--------|-------|--------|-------|--------|
| <b>Total cholesterol</b> | 1284 | -0.03 | 0.24   | -0.11 | <0.001 | -0.12 | <0.001 |
| <b>Triglycerides</b>     | 1284 | 0.31  | <0.001 | 0.17  | <0.001 | 0.16  | <0.001 |

All correlation (rho) values refer to Spearman nonparametric rank correlation coefficients

TNF=Tumor Necrosis Factor; sTNF-R1=Tumor Necrosis Factor Receptor Type I; sTNF-R2=Tumor Necrosis Factor Type II
